# Supplementary material for: Potentially toxic metal(loid) distribution and migration in the bottom weathering profile of indigenous zinc smelting slag pile in clastic rock region
Source: PeerJ. 2021 Apr 7;9:e10825. doi: 10.7717/peerj.10825 (PMC8035896; doi:10.7717/peerj.10825)
Supplement: Supplemental Information 2 [file peerj-09-10825-s002.xlsx]

## Sheet: Raw data
			Method		ME-MS61	ME-MS61	ME-MS61	ME-MS61	ME-MS41L	ME-MS61	ME-MS61	ME-MS61
			Analyte	pH	As	Cd	Cr	Cu	Hg	Pb	Zn	Al
			Units	dimensionless numbers	mg/kg	mg/kg	mg/kg	mg/kg	mg/kg	mg/kg	mg/kg	%
			Lowest limits of quantifications	0.01	0.2	0.02	1	0.2	0.004	0.5	2	0.01
Soil profile	Characteristics of soil profile	Sample number and sampling depth (cm)	Characteristics of sample	pH	As	Cd	Cr	Cu	Hg	Pb	Zn	Al
Slag-covered	In clastic rock region, covered by the indigenous zinc smelting zinc slag	Slag	Dark gray silt with fragments of slag	6.83	636	192	68	499	0.098	10550	16450	5.41
		S1(0～10)	Dark gray light loam	4.42	14.8	4.59	70	163.5	0.087	191.5	367	10.3
		S2(10～30)	Brown light loam	4.52	9.7	1.23	64	164	0.081	78.1	254	10.35
		S3(30～50)	Brown light loam	4.68	5.9	1.94	73	156.5	0.052	46.3	270	10.15
		S4(50～70)	Brown light loam	4.65	2.7	0.75	59	147	0.055	12.8	212	10.45
		S5(70～90)	Light brown sand loam	4.67	3.4	0.75	66	156.5	0.09	15.4	185	10.5
		S6(90～110)	Light brown sand loam	4.69	5	0.99	67	145.5	0.081	44.5	199	9.97
		S7(110～130)	Light brown sand loam	4.81	1.1	2.16	61	159	0.035	10.2	342	10.45
		S8(130～150)	Light brown sand	5.08	1.6	2.89	71	134	0.032	17.2	250	9.89
		S9(150～170)	Light brown sand	5.22	0.5	1.2	66	133.5	0.025	7.7	153	9.34
		S10(170～190)	Light brown sand	5.22	1.4	0.61	75	148.5	0.03	17.9	186	10.1
		S11(190～210)	Dark gray sand contains black granular coal	5.02	2.8	2.54	77	102	0.075	18.4	127	6.88
Slag-absent	In clastic rock region, covered with natural vegetation and without the slag, 100 meters away from the slag-covered profile	S1(0～10)	Brown light loam	4.46	6.6	1.82	78	132	0.11	19.6	202	9.7
		S2(10～30)	Brown light loam	4.56	6.7	0.64	72	127.5	0.105	14.7	149	9.78
		S3(30～55)	Brown light loam	4.84	6.9	0.19	73	133	0.106	14.9	143	10.15
		S4(55～80)	Brown light loam	4.98	7.8	0.17	94	135	0.069	16.2	144	10.35
		S5(80～105)	Light brown sand loam	5.09	7.7	0.15	76	134	0.058	15.6	142	10.2
		S6(105～130)	Light brown sand loam	5.06	5.5	0.14	76	129	0.068	15.2	139	10.2
		S7(130～155)	Light brown sand	5.12	3.7	0.17	76	130.5	0.044	8.4	129	9.77
		S8(155～180)	Light brown sand	5.09	1.8	0.2	72	130	0.027	5.7	135	8.93
		S9(180～205)	Light brown sand	5.07	2.6	0.21	68	118	0.051	9.1	133	8.68
		S10(205～225)	Dark gray sand contains black granular coal	5.09	0.2	0.83	49	84.5	0.046	10.3	61	5.1
